# Supplementary material for: Nuevos registros para la flora de musgos de mexico y del valle de mexico
Source: MDPI journal article supplement (doi:10.3390/ijms232315282), 1989-01-01
Supplement: s1 [file s1]

## Supplementary Figure S1 and Figure Legends

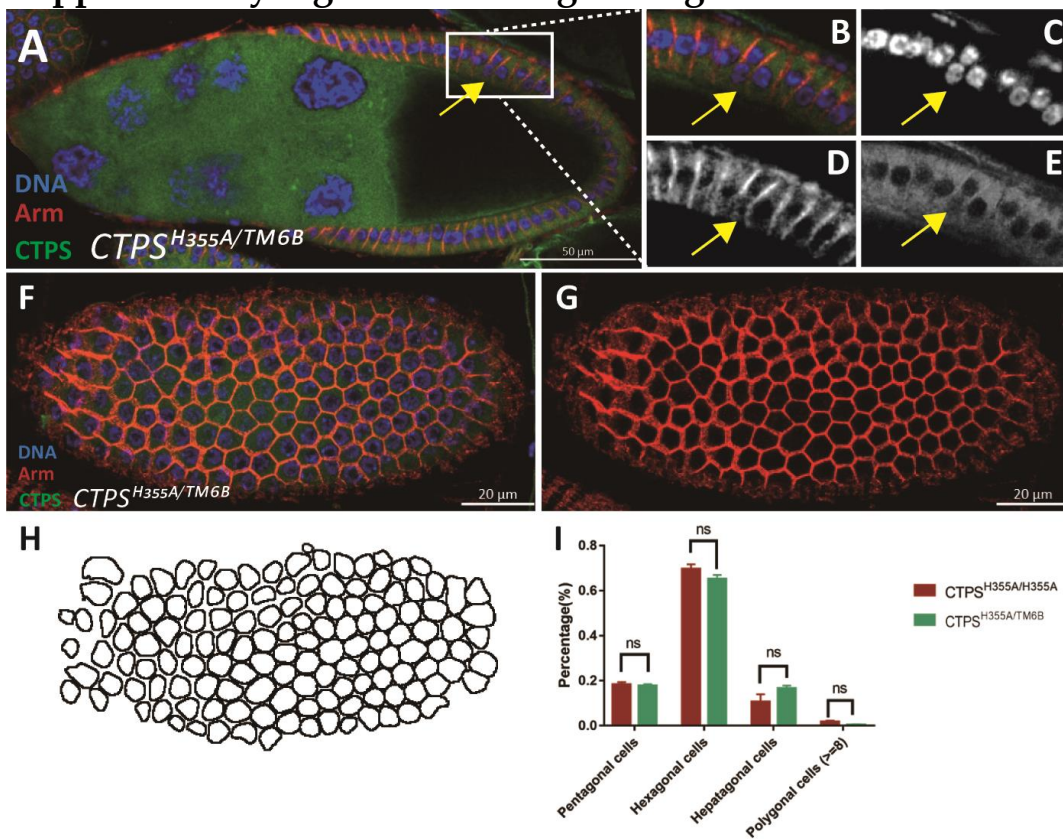

**Supplementary Figure S1. *CTPS<sup>H355A/TM6B</sup>* mutants have no significant difference from *CTPS<sup>H355A</sup>* mutant.** (A-E) Follicle cell ingress in *CTPS<sup>H355A/TM6B</sup>* mutants. CTPS is labelled using CTPS antibody and there is no cytoophidia (Green), Armadillo marked cell membrane (Red), DNA is labelled using HOECHST 33342 (Blue). (F-H) Surface view of a stage 8 *CTPS<sup>H355A/TM6B</sup>* egg chamber. (I) Quantitative analysis of the morphological difference between the *CTPS<sup>H355A</sup>* and the *CTPS<sup>H355A/TM6B</sup>* follicle cells (6 egg chambers were quantified at stage 8 per genotype, biological repeats = 3). Mann Whitney U test.
